## **Differentially expressed gene profile and relevant pathways of the inhibition of LAMP5 on MLL-rearranged leukemias**

Zhiwen Qian, Wei Zhang<sup>1</sup>

Shanghai University of Medicine and Health Sciences

\*Corresponding author: Zhiwen Qian (zwq@dr.com), Shanghai University of Medicine and Health Sciences, Shanghai, China

## **Abstract**

LAMP5 is a lysosome-related protein, which showed increased expression levels in MLL-r leukemia. Recent findings showed that LAMP5 is involved in MLL-fusion protein but the specific mechanism is still unclear. In our study, we aim to identify the transcriptional landscapes of the LAMP5-shRNA-treated MLL-r leukemia cells. We used the gene enrichment analyses such as KEGG and GO to further analyze the potential signaling pathways. Moreover, we constructed the PPI network and Reactome map to further identify the biological processes. We found that Lysosome and Cell Cycle are the major signaling pathways involved in the LAMP5-shRNA treated MLL-r leukemia cells. We identified the top ten interactive genes including CDK1, TOP2A, PLK1, CCNA2, ASPM, BUB1, BUB1B, CCNB1, AURKA, and KIF11. Our study may provide novel mechanisms for the treatment of MLL-r leukemia by inhibiting LAMP5.

## **Introduction**

The abnormal activity of the MLL gene is the cause of aggressive leukemias and shows in about 10% of human acute leukemias<sup>1</sup>. MLL-leukemia is a kind of acute myeloid leukemia (AML) and acute lymphoblastic leukemia (ALL) that are identified in both children and adults<sup>2</sup>. MLL rearrangement is a poor prognosis maker that is identified in infants with ALL<sup>3</sup>. There is an urgent need for more effective, less toxic therapies. MLL rearrangements create a chimeric gene that encodes a protein that can cause cancers<sup>4</sup>. MLL fusion proteins bind to DNA/chromatin and lead to leukemic transformation in hematopoietic stem and progenitor cells through transcriptional regulation<sup>5</sup>. The best-studied target genes contain HOXA genes, which have been shown to be critical for leukemia development and progression<sup>6</sup>. Other important members of the MLL fusion-driven gene expression program contain CDK6 and MEF2C. Other work has focused on the mechanisms that would lead to new therapeutic approaches<sup>7</sup>.

LAMP-5 belongs to the lysosome-associated membrane protein (LAMP) family, which shows widespread expression, and the Lamp5 expression in mice is confined to several regions of the postnatal brain<sup>8</sup>. LAMP5 is typically expressed in plasmacytoid dendritic cells (pDC) in human brains<sup>9</sup>. LAMP-5 helps the transport of TLR9 from early endosomal to lysosomal signaling vesicles, thereby mediating type 1 interferon and pro-inflammatory signaling respectively<sup>10</sup>. Moreover, LAMP-5 acts as a cell surface protein

and plays an essential role in MLLr leukemias through the regulation of innate immune signaling<sup>4</sup>.

In this study, our aim is to identify the role of LAMP-5 in MLL-rearranged acute leukemia by analyzing the RNA-seq data. We further analyzed the KEGG, GO, Reactome map, and PPI for exploring the mechanisms of the knockdown of LAMP-5 in acute leukemia cells. Therefore, our study may provide directions for identifying the drug targets of acute leukemia.

## Methods

### Acquisition of microarray data

GEO database (<http://www.ncbi.nlm.nih.gov/geo/>) was used for downloading the following gene expression profile dataset: GSE166523. The data was produced by the Illumina HiSeq 2500 (Homo sapiens) (Cincinnati Children's Hospital, Biomedical Informatics, Nathan Salomonis, 3333 Burnet Avenue, Cincinnati, OH 45229, USA). The dataset was chosen based on the criteria as follows: Studies comparing control shRNAs treated MLL leukemia cells with LAMP-5 shRNAs treated MLL leukemia cells; Studies included gene expression profiles; Datasets were excluded if the study did not contain control groups; Datasets from other organisms were excluded.

### Identification of differentially expressed genes (DEGs)

The gene expression matrix data in the GSE166523 dataset was normalized and processed through the R program as described. Then, the empirical Bayesian algorithm in the "limma" package was applied and compared between patients with diseases and the healthy control population as controls with the detection thresholds of adjusted P-values  $<0.05$  and  $|\log_2FC| >1$ .

### Gene intersection between DEGs

We intersected the DEGs screened by the "limma" package with the modular genes. The intersecting genes were analyzed for Kyoto Encyclopedia of Genes and Genomes (KEGG) and Gene Ontology (GO) enrichment using the "clusterProfiler" package in the R program. The results were then visualized using the "ggplot2" package.

## Protein-protein interaction (PPI) networks

The interacting genes were constructed using Protein-Protein Interaction Networks Functional Enrichment Analysis (STRING; <http://string.db.org>). The Molecular Complex Detection (MCODE) was used to analyze the PPI networks. This method predicts the PPI network and provides an insight into the biological mechanisms. The biological processes analyses were further performed by using Reactome (<https://reactome.org/>), and  $P < 0.05$  was considered significant.

## Results

### **DEGs in MLL-rearranged acute leukemia treated with LAMP-5 shRNAs**

To determine the effects of LAMP-5 on MLL-rearranged acute leukemia, we used the RNA-seq data from the GEO database (GSE166523). We identified the 1130 significantly changed genes [DEGs, differentially expressed genes (DEGs),  $P < 0.01$ ]. The top increased and decreased genes were also indicated by the heatmap (Figure 1). We further presented the top ten significant genes in Table 1.

### **Gene enrichment and function analyses in MLL-rearranged acute leukemia treated with LAMP-5 shRNAs**

To determine the features of significant genes, we performed the gene enrichment analysis (Figure 2). We found the top 10 changed KEGG items ( $P < 0.05$ ), including “Lysosome”, “Cell cycle”, “Nucleocytoplasmic transport”, “Progesterone-mediated oocyte maturation”, “DNA replication”, “Cholesterol metabolism”, “Mismatch repair”, “Base excision repair”, “Homologous recombination”, and “Galactose metabolism”. We found the top 10 changed Biological Processes (BP,  $P < 0.05$ ), including “organelle fission”, “nuclear division”, “chromosome segregation”, “mitotic nuclear division”, “nuclear chromosome segregation”, “sister chromatid segregation”, “DNA replication”, “mitotic sister chromatid segregation”, “spindle organization”, “mitotic spindle organization”. We identified the top 10 changed Cellular Components (CC,  $P < 0.05$ ), including “chromosomal region”, “spindle”, “chromosome, centromeric region”, “condensed chromosome”, “condensed chromosome, centromeric region”, “kinetochore”, “mitotic spindle”, “spindle pole”, “CMG complex”, “DNA replication preinitiation complex”. We figured out the top 10 changed Molecular Functions (MF,  $P$

< 0.05), including “tubulin binding”, “microtubule binding”, “catalytic activity, acting on DNA”, “microtubule motor activity”, “DNA helicase activity”, “single-stranded DNA helicase activity”, “nuclear localization sequence binding”, “DNA replication origin binding”, “lamin binding”, “histone kinase activity”.

### **The protein-protein interaction (PPI) network and Reactome analyses**

We constructed the PPI network by using 1040 nodes and 9267 edges with the Cytoscape software (combined score > 0.2). The top ten genes with the highest degree scores were presented in Table 2. By analyzing the PPI network, we further constructed the top two clusters in Figure 3. Finally, we constructed the Reactome map by using the PPI network and DEGs (Figure 4) and we performed the Reactome analysis to further identify the top ten Reactome biological processes, including “Cell Cycle, Mitotic”, “Cell Cycle”, “Cell Cycle Checkpoints”, “DNA strand elongation”, “Mitotic Prometaphase”, “Resolution of Sister Chromatid Cohesion”, “Amplification of signal from unattached kinetochores via a MAD2 inhibitory signal”, “Amplification of signal from the kinetochores”, “Activation of ATR in response to replication stress”, and “M Phase” (Supplemental Table S1).

### **Discussion**

The MLL is related to chromosomal translocations in a subtype of acute leukemia, which includes acute lymphoblastic leukemia and myeloid leukemia<sup>11</sup>. Interestingly, LAMP5 is a direct target of the oncogenic MLL-fusion protein, which is a potential target for the treatment of MLL-rearranged acute leukemia<sup>12</sup>. In this study, we obtained the key molecules and signaling pathways by bioinformatic method, which will help us understand the mechanisms of LAMP5-regulated leukemia.

Our study identified the most important signaling pathways “Lysosome” and “Cell Cycle” that strongly correlated with the LAMP5 mediated MLL-rearranged acute leukemia. Similarly, Sreoshee Rafiq et al reported that lysosomes play an important role in degrading cellular macromolecules and recently showed the ability to regulate the tumor microenvironment in leukemia<sup>13</sup>. Interestingly, Karolin Eifler et al also reported that SUMOylation can control the cell cycle in the progression of cancers<sup>14</sup>.

Our study also found the critical molecules by creating the PPI network based on the LAMP5-regulated leukemia data (Table 2). Similarly, Z Huang et al found that CDK1 increases the interaction of SOX2 to further enhance the stemness of lung cancer cells<sup>15</sup>. G protein-coupled receptors are essential for cell functions and are involved in several diseases<sup>16-34</sup>. P M Cobelens et al found that hydrogen peroxide damages GRK2 (GPCR-related protein) via calpain and cdk1- mediated signaling pathway<sup>35</sup>. Fan Zhang et al found that the inhibition of TOP2A by miRNA-599 can repress the malignancy of bladder cancer cells<sup>36</sup>. The study by Lilia Gheghiani et al showed that PLK1 leads to chromosomal instability to promote the progression of cancer<sup>37</sup>. The study by Yichao Wang showed that CCNA2 acts as a potential marker for breast cancer<sup>38</sup>. Qian Yang et al found that ASPM is a key biomarker that is closely related to the cell proliferation of colorectal cancer cells<sup>39</sup>. The study by Li-Jing Zhu et al showed that BUB1 can increase the proliferation of cancer cells by regulating the phosphorylation of SMAD2<sup>40</sup>. The study by Juan-Hua Tian et al showed that BUB1B is critical for cancer cell proliferation and is strongly correlated with poorer outcomes for patients with cancer. Moreover, BUB1B can control MELK which is important for cancer progression<sup>41</sup>. Hui Zhang et al found the CCNB can regulate the cell cycle and aging by mediating the p53 signaling pathway in cancers<sup>42</sup>. Ruijuan Du et al reported that AURKA is critical for cancer treatment and found that AURKA can control the functions of AURKA substrates to regulate tumor suppressors or oncogenes<sup>43</sup>. Circadian genes are essential molecules in the cells, which can regulate the gene expression and protein modification to further regulate the cell functions in several diseases such as cancer<sup>44-55</sup>. Cristina Cadenas found that the loss of circadian clock genes can enhance tumor progression by regulating cancer-related genes such as AURKA<sup>56</sup>. Izabela Neska-Długosz et al found the KIF11 gene expression is changed in cancer tissues, which is related to the outcome of patients with colorectal cancers<sup>57</sup>.

In conclusion, this study identified the critical molecules in the MLL-rearranged acute leukemia with the knockdown of LAMP5. The major signaling pathways are “Lysosome” and “Cell Cycle” signaling pathways. Therefore, our study may provide insights into the treatment of leukemia by mediating LAMP5.

### **Author Contributions**

Zhiwen Qian, Wei Zhang: Methodology, Conceptualization, Writing- Reviewing and Editing.

### **Funding**

This work was not supported by any funding.

### **Declarations of interest**

There is no conflict of interest to declare

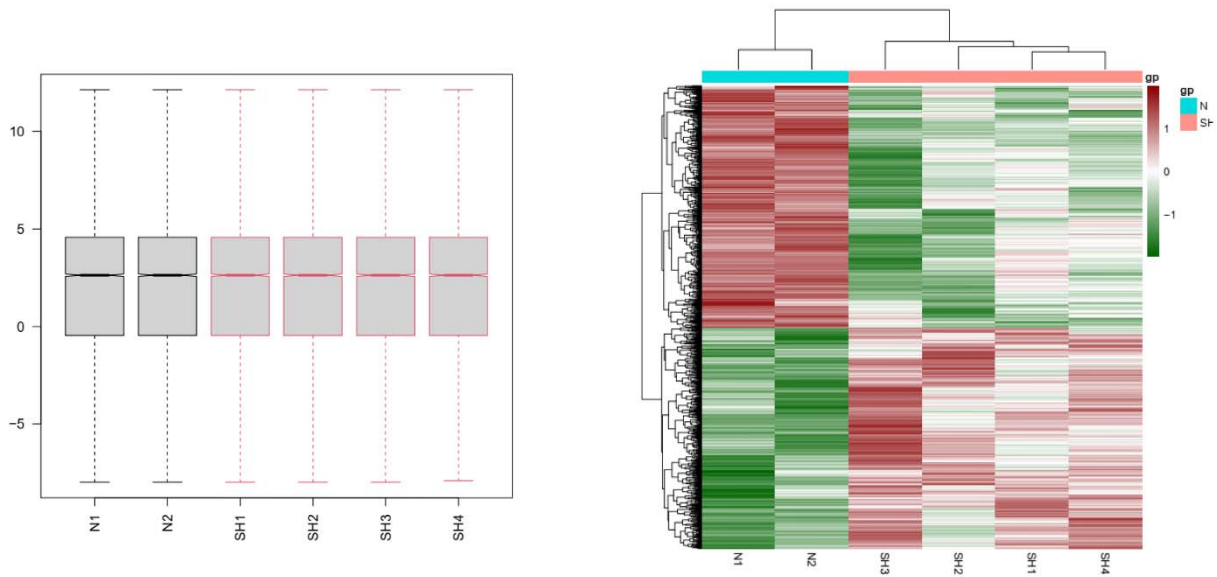

**Figure 1. Heatmap in MLL-rearranged acute leukemia treated with LAMP-5 shRNAs**

(A) DEGs ( $P < 0.05$ ) were calculated and used to construct the heatmap. N, control shRNAs; SH, LAMP-5 shRNAs.



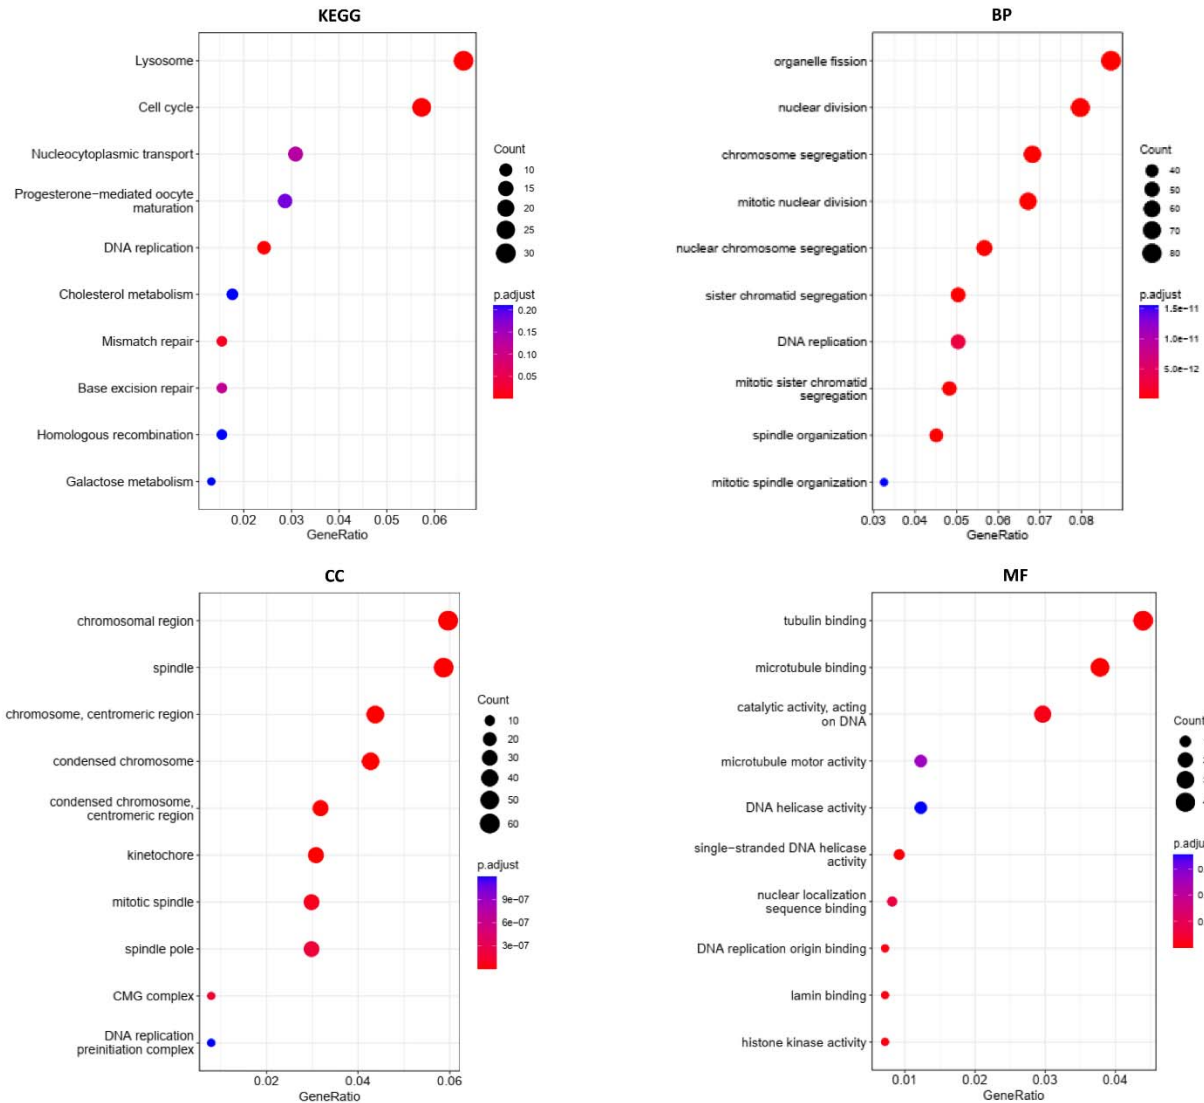

**Figure 2. Gene enrichments in MLL-rearranged acute leukemia treated with LAMP-5 shRNAs**

KEGG analysis; BP: Biological processes; CC: Cellular components; MF: Molecular functions.

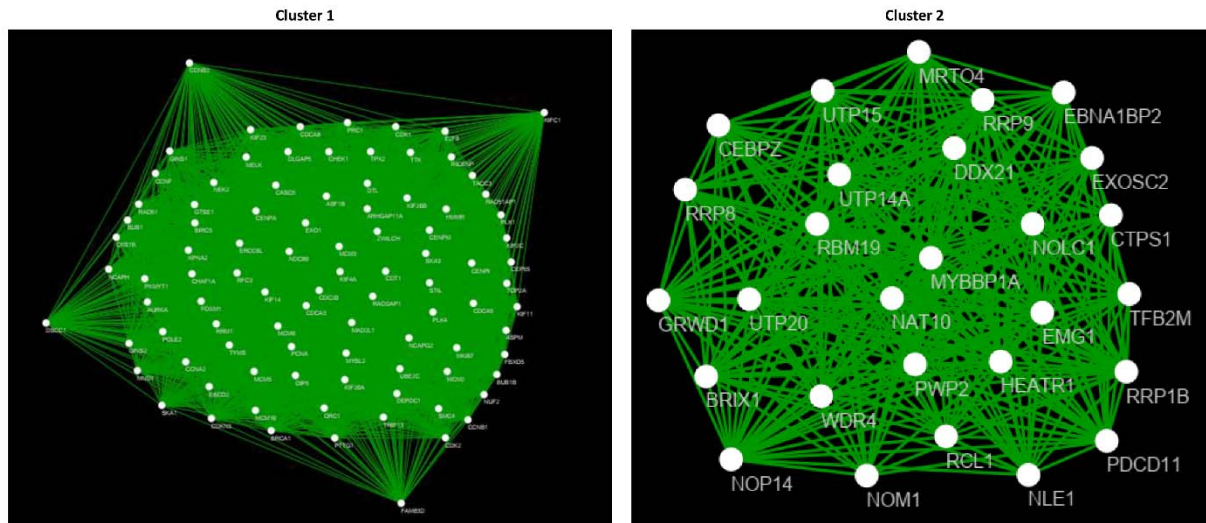

**Figure 3. The PPI network analyses of DEGs in MLL-rearranged acute leukemia treated with LAMP-5 shRNAs**

The cluster 1 and cluster 2 were constructed by MCODE.



**Table 1**

| Entrez gene                       | Gene symbol                       | Fold-change  | Regulation |
|-----------------------------------|-----------------------------------|--------------|------------|
| <b>Top 10 down-regulated DEGs</b> |                                   |              |            |
| 109286553                         | ARHGAP27P1-<br>BPTFP1-<br>KPNA2P3 | -7.946075635 | Down       |
| 2550                              | GABBR1                            | -3.684443557 | Down       |
| 721                               | C4B                               | -3.638234913 | Down       |
| 166929                            | SGMS2                             | -3.552841349 | Down       |
| 3680                              | ITGA9                             | -3.502870969 | Down       |
| 389136                            | VGLL3                             | -3.310252783 | Down       |
| 729156                            | GTF2IRD1P1                        | -3.285008187 | Down       |
| 110384692                         | LOC110384692                      | -3.259894772 | Down       |
| 3304                              | HSPA1B                            | -3.248198068 | Down       |
| 2348                              | FOLR1                             | -3.176667051 | Down       |
| <b>Top 10 up-regulated DEGs</b>   |                                   |              |            |
| 2201                              | FBN2                              | 3.315475628  | up         |
| 1756                              | DMD                               | 3.053808223  | up         |
| 55638                             | SYBU                              | 3.034450873  | up         |
| 4969                              | OGN                               | 2.869198695  | up         |
| 150297                            | C22orf42                          | 2.600728621  | up         |
| 222389                            | BEND7                             | 2.588555017  | up         |
| 3291                              | HSD11B2                           | 2.540267099  | up         |
| 126326                            | GIPC3                             | 2.511293603  | up         |
| 439936                            | LINC02899                         | 2.501121439  | up         |
| 101929777                         | LOC101929777                      | 2.369186806  | up         |

**Table 2. Top ten genes demonstrated by connectivity degree in the PPI network**

| <b>Gene symbol</b> | <b>Gene title</b>                                 | <b>Degree</b> |
|--------------------|---------------------------------------------------|---------------|
| <b>CDK1</b>        | Cyclin Dependent Kinase 1                         | 154           |
| <b>TOP2A</b>       | DNA Topoisomerase II Alpha                        | 141           |
| <b>PLK1</b>        | Polo Like Kinase 1                                | 140           |
| <b>CCNA2</b>       | Cyclin A2                                         | 137           |
| <b>ASPM</b>        | Assembly Factor for Spindle Microtubules          | 136           |
| <b>BUB1</b>        | BUB1 Mitotic Checkpoint Serine/Threonine Kinase   | 135           |
| <b>BUB1B</b>       | BUB1 Mitotic Checkpoint Serine/Threonine Kinase B | 134           |
| <b>CCNB1</b>       | Cyclin B1                                         | 134           |
| <b>AURKA</b>       | Aurora Kinase A                                   | 132           |
| <b>KIF11</b>       | Kinesin Family Member 11                          | 131           |

## References

- [1] Muntean AG, Hess JL: The pathogenesis of mixed-lineage leukemia. *Annu Rev Pathol* 2012, 7:283-301.
- [2] Slany RK: The molecular biology of mixed lineage leukemia. *Haematologica* 2009, 94:984-93.
- [3] Behm FG, Raimondi SC, Frestedt JL, Liu Q, Crist WM, Downing JR, Rivera GK, Kersey JH, Pui CH: Rearrangement of the MLL gene confers a poor prognosis in childhood acute lymphoblastic leukemia, regardless of presenting age. *Blood* 1996, 87:2870-7.
- [4] Winters AC, Bernt KM: MLL-Rearranged Leukemias-An Update on Science and Clinical Approaches. *Front Pediatr* 2017, 5:4.
- [5] Liu H, Cheng EH, Hsieh JJ: MLL fusions: pathways to leukemia. *Cancer Biol Ther* 2009, 8:1204-11.
- [6] Chen CW, Armstrong SA: Targeting DOT1L and HOX gene expression in MLL-rearranged leukemia and beyond. *Exp Hematol* 2015, 43:673-84.
- [7] van der Linden MH, Willekes M, van Roon E, Seslija L, Schneider P, Pieters R, Stam RW: MLL fusion-driven activation of CDK6 potentiates proliferation in MLL-rearranged infant ALL. *Cell Cycle* 2014, 13:834-44.
- [8] Wang WT, Han C, Sun YM, Chen ZH, Fang K, Huang W, Sun LY, Zeng ZC, Luo XQ, Chen YQ: Activation of the Lysosome-Associated Membrane Protein LAMP5 by DOT1L Serves as a Bodyguard for MLL Fusion Oncoproteins to Evade Degradation in Leukemia. *Clin Cancer Res* 2019, 25:2795-808.
- [9] Combes A, Camosseto V, N'Guessan P, Arguello RJ, Mussard J, Caux C, Bendriss-Vermare N, Pierre P, Gatti E: BAD-LAMP controls TLR9 trafficking and signalling in human plasmacytoid dendritic cells. *Nat Commun* 2017, 8:913.
- [10] Saitoh SI, Abe F, Kanno A, Tanimura N, Mori Saitoh Y, Fukui R, Shibata T, Sato K, Ichinohe T, Hayashi M, Kubota K, Kozuka-Hata H, Oyama M, Kikko Y, Katada T, Kontani K, Miyake K: TLR7 mediated viral recognition results in focal type I interferon secretion by dendritic cells. *Nat Commun* 2017, 8:1592.
- [11] Aplan PD: Chromosomal translocations involving the MLL gene: molecular mechanisms. *DNA Repair (Amst)* 2006, 5:1265-72.
- [12] Cantilena S, Gasparoli L, Pal D, Heidenreich O, Klusmann JH, Martens JHA, Faille A, Warren AJ, Karsa M, Pandher R, Somers K, Williams O, de Boer J: Direct targeted therapy for MLL-fusion-driven high-risk acute leukaemias. *Clin Transl Med* 2022, 12:e933.
- [13] Rafiq S, McKenna SL, Muller S, Tschan MP, Humbert M: Lysosomes in acute myeloid leukemia: potential therapeutic targets? *Leukemia* 2021, 35:2759-70.
- [14] Eifler K, Vertegaal ACO: SUMOylation-Mediated Regulation of Cell Cycle Progression and Cancer. *Trends Biochem Sci* 2015, 40:779-93.
- [15] Huang Z, Shen G, Gao J: CDK1 promotes the stemness of lung cancer cells through interacting with Sox2. *Clin Transl Oncol* 2021, 23:1743-51.
- [16] Rosenbaum DM, Rasmussen SG, Kobilka BK: The structure and function of G-protein-coupled receptors. *Nature* 2009, 459:356-63.
- [17] Yuan G, Yang S, Gautam M, Luo W, Yang S: Macrophage regulator of G-protein signaling 12 contributes to inflammatory pain hypersensitivity. *Ann Transl Med* 2021, 9:448.
- [18] Xie K, Martemyanov KA: Control of striatal signaling by g protein regulators. *Front Neuroanat* 2011, 5:49.
- [19] Yuan G, Yang S: Effect of Regulator of G Protein Signaling Proteins on Bone. *Front Endocrinol (Lausanne)* 2022, 13:842421.
- [20] Fu C, Yuan G, Yang ST, Zhang D, Yang S: RGS12 Represses Oral Cancer via the Phosphorylation and SUMOylation of PTEN. *J Dent Res* 2021, 100:522-31.
- [21] Stewart A, Fisher RA: Introduction: G Protein-coupled Receptors and RGS Proteins. *Prog Mol Biol Transl Sci* 2015, 133:1-11.

- [22] Yuan G, Yang S, Yang S, Ng A, Oursler MJ: RGS12 is a critical proinflammatory factor in the pathogenesis of inflammatory arthritis via acting in Cox2-RGS12-NF kappa B pathway activation loop. *J Bone Miner Res: WILEY 111 RIVER ST, HOBOKEN 07030-5774, NJ USA*, 2019. pp. 147-.
- [23] Iwai K, Koike M, Ohshima S, Miyatake K, Uchiyama Y, Saeki Y, Ishii M: RGS18 acts as a negative regulator of osteoclastogenesis by modulating the acid-sensing OGR1/NFAT signaling pathway. *J Bone Miner Res* 2007, 22:1612-20.
- [24] Yuan G, Yang S, Liu M, Yang S: RGS12 is required for the maintenance of mitochondrial function during skeletal development. *Cell Discov* 2020, 6:59.
- [25] Appleton CT, James CG, Beier F: Regulator of G-protein signaling (RGS) proteins differentially control chondrocyte differentiation. *J Cell Physiol* 2006, 207:735-45.
- [26] Yuan G, Huang Y, Yang ST, Ng A, Yang S: RGS12 inhibits the progression and metastasis of multiple myeloma by driving M1 macrophage polarization and activation in the bone marrow microenvironment. *Cancer Commun (Lond)* 2022, 42:60-4.
- [27] Tsingotjidou A, Nervina JM, Pham L, Bezouglaia O, Tetradis S: Parathyroid hormone induces RGS-2 expression by a cyclic adenosine 3',5'-monophosphate-mediated pathway in primary neonatal murine osteoblasts. *Bone* 2002, 30:677-84.
- [28] Yuan G, Fu C, Yang ST, Yuh DY, Hajishengallis G, Yang S: RGS12 Drives Macrophage Activation and Osteoclastogenesis in Periodontitis. *J Dent Res* 2022, 101:448-57.
- [29] Nisancioglu MH, Mahoney WM, Jr., Kimmel DD, Schwartz SM, Betsholtz C, Genove G: Generation and characterization of rgs5 mutant mice. *Mol Cell Biol* 2008, 28:2324-31.
- [30] Yuan G, Yang S-t, Yang S: RGS12 promotes inflammatory arthritis by activating synovial fibroblasts through enhancing primary ciliogenesis. *J Bone Miner Res: WILEY 111 RIVER ST, HOBOKEN 07030-5774, NJ USA*, 2022. pp. 50-.
- [31] Teplyuk NM, Galindo M, Teplyuk VI, Pratap J, Young DW, Lapointe D, Javed A, Stein JL, Lian JB, Stein GS, van Wijnen AJ: Runx2 regulates G protein-coupled signaling pathways to control growth of osteoblast progenitors. *J Biol Chem* 2008, 283:27585-97.
- [32] Yuan G, Yang S, Ng A, Fu C, Oursler MJ, Xing L, Yang S: RGS12 Is a Novel Critical NF-kappaB Activator in Inflammatory Arthritis. *iScience* 2020, 23:101172.
- [33] Maruyama T, Jiang M, Abbott A, Yu HI, Huang Q, Chrzanowska-Wodnicka M, Chen EI, Hsu W: Rap1b Is an Effector of Axin2 Regulating Crosstalk of Signaling Pathways During Skeletal Development. *J Bone Miner Res* 2017, 32:1816-28.
- [34] Yuan G, Yang S, Yang S: Macrophage RGS12 contributes to osteoarthritis pathogenesis through enhancing the ubiquitination. *Genes Dis* 2022, 9:1357-67.
- [35] Cobelens PM, Kavelaars A, Heijnen CJ, Ribas C, Mayor F, Jr., Penela P: Hydrogen peroxide impairs GRK2 translation via a calpain-dependent and cdk1-mediated pathway. *Cell Signal* 2007, 19:269-77.
- [36] Zhang F, Wu H: MiR-599 targeting TOP2A inhibits the malignancy of bladder cancer cells. *Biochem Biophys Res Commun* 2021, 570:154-61.
- [37] Gheghiani L, Wang L, Zhang Y, Moore XTR, Zhang J, Smith SC, Tian Y, Wang L, Turner K, Jackson-Cook CK, Mukhopadhyay ND, Fu Z: PLK1 Induces Chromosomal Instability and Overrides Cell-Cycle Checkpoints to Drive Tumorigenesis. *Cancer Res* 2021, 81:1293-307.
- [38] Wang Y, Zhong Q, Li Z, Lin Z, Chen H, Wang P: Integrated Profiling Identifies CCNA2 as a Potential Biomarker of Immunotherapy in Breast Cancer. *Onco Targets Ther* 2021, 14:2433-48.
- [39] Yang Q, Qi M, Chen Y, Tian S, Liao F, Dong W: ASPM is a Novel Candidate Gene Associated with Colorectal Cancer Cell Growth. *DNA Cell Biol* 2021, 40:921-35.
- [40] Zhu LJ, Pan Y, Chen XY, Hou PF: BUB1 promotes proliferation of liver cancer cells by activating SMAD2 phosphorylation. *Oncol Lett* 2020, 19:3506-12.

- [41] Tian JH, Mu LJ, Wang MY, Zeng J, Long QZ, Guan B, Wang W, Jiang YM, Bai XJ, Du YF: BUB1B Promotes Proliferation of Prostate Cancer via Transcriptional Regulation of MELK. *Anticancer Agents Med Chem* 2020, 20:1140-6.
- [42] Zhang H, Zhang X, Li X, Meng WB, Bai ZT, Rui SZ, Wang ZF, Zhou WC, Jin XD: Effect of CCNB1 silencing on cell cycle, senescence, and apoptosis through the p53 signaling pathway in pancreatic cancer. *J Cell Physiol* 2018, 234:619-31.
- [43] Du R, Huang C, Liu K, Li X, Dong Z: Targeting AURKA in Cancer: molecular mechanisms and opportunities for Cancer therapy. *Mol Cancer* 2021, 20:15.
- [44] Reppert SM, Weaver DR: Coordination of circadian timing in mammals. *Nature* 2002, 418:935-41.
- [45] Yuan G, Xu L, Cai T, Hua B, Sun N, Yan Z, Lu C, Qian R: Clock mutant promotes osteoarthritis by inhibiting the acetylation of NFkappaB. *Osteoarthritis Cartilage* 2019, 27:922-31.
- [46] Xu L, Cheng Q, Hua B, Cai T, Lin J, Yuan G, Yan Z, Li X, Sun N, Lu C, Qian R: Circadian gene Clock regulates mitochondrial morphology and functions by posttranscriptional way. *bioRxiv* 2018:365452.
- [47] Zhu Z, Hua B, Shang Z, Yuan G, Xu L, Li E, Li X, Sun N, Yan Z, Qian R, Lu C: Altered Clock and Lipid Metabolism-Related Genes in Atherosclerotic Mice Kept with Abnormal Lighting Condition. *Biomed Res Int* 2016, 2016:5438589.
- [48] Yuan G, Hua B, Cai T, Xu L, Li E, Huang Y, Sun N, Yan Z, Lu C, Qian R: Clock mediates liver senescence by controlling ER stress. *Aging* 2017, 9:2647-65.
- [49] Mao SZ, Fan XF, Xue F, Chen R, Chen XY, Yuan GS, Hu LG, Liu SF, Gong YS: Intermedin modulates hypoxic pulmonary vascular remodeling by inhibiting pulmonary artery smooth muscle cell proliferation. *Pulm Pharmacol Ther* 2014, 27:1-9.
- [50] Zhu Z, Xu L, Cai T, Yuan G, Sun N, Lu C, Qian R: Clock represses preadipocytes adipogenesis via GILZ. *J Cell Physiol* 2018, 233:6028-40.
- [51] Yuan G, Hua B, Yang Y, Xu L, Cai T, Sun N, Yan Z, Lu C, Qian R: The Circadian Gene Clock Regulates Bone Formation Via PDIA3. *J Bone Miner Res* 2017, 32:861-71.
- [52] Zhu Z, Hua B, Xu L, Yuan G, Li E, Li X, Sun N, Yan Z, Lu C, Qian R: CLOCK promotes 3T3-L1 cell proliferation via Wnt signaling. *IUBMB Life* 2016, 68:557-68.
- [53] Fan XF, Wang XR, Yuan GS, Wu DH, Hu LG, Xue F, Gong YS: [Effect of safflower injection on endoplasmic reticulum stress-induced apoptosts in rats with hypoxic pulmonary hypertension]. *Zhongguo Ying Yong Sheng Li Xue Za Zhi* 2012, 28:561-7.
- [54] Yuan G: Identification of biomarkers and pathways of mitochondria in sepsis patients. *bioRxiv* 2021:2021.03.29.437586.
- [55] Cai T, Hua B, Luo D, Xu L, Cheng Q, Yuan G, Yan Z, Sun N, Hua L, Lu C: The circadian protein CLOCK regulates cell metabolism via the mitochondrial carrier SLC25A10. *Biochim Biophys Acta Mol Cell Res* 2019, 1866:1310-21.
- [56] Cadenas C, van de Sandt L, Edlund K, Lohr M, Hellwig B, Marchan R, Schmidt M, Rahnenfuhrer J, Oster H, Hengstler JG: Loss of circadian clock gene expression is associated with tumor progression in breast cancer. *Cell Cycle* 2014, 13:3282-91.
- [57] Neska-Dlugosz I, Buchholz K, Durslewicz J, Gagat M, Grzanka D, Tojek K, Klimaszewska-Wisniewska A: Prognostic Impact and Functional Annotations of KIF11 and KIF14 Expression in Patients with Colorectal Cancer. *Int J Mol Sci* 2021, 22.
